# Supplementary material for: Short and long-term psychosocial consequences of participating in a colorectal cancer screening programme: a matched longitudinal study
Source: HighWire-hosted journal article supplement (doi:10.1136/bmjebm-2020-111576), 2021-06-03
Supplement: bmjebm-2020-111576supp001_data_supplement.pdf [file bmjebm-2020-111576supp001_data_supplement.pdf]

Supplemental material 1, Table 2

Mean differences between the study groups and the reference group

| COS-CRC part I, scale (range of values)                | Study group            | After screening result (95% CI) | p-value* | Two months after final result (95% CI) | p-value* | Twelve months after final result (95% CI) | p-value* |
|--------------------------------------------------------|------------------------|---------------------------------|----------|----------------------------------------|----------|-------------------------------------------|----------|
| 1. Sense of dejection (0-18)                           | Not screened           | 0.13 (-0.16 – 0.43)             | 0.3857   | 0.28 (-0.06 – 0.63)                    | 0.1078   | N/A                                       | N/A      |
|                                                        | Negative               | Reference                       |          | Reference                              |          | Reference                                 |          |
|                                                        | No abnormalities (NoA) | 2.92 (2.38 – 3.47)              | <0.0001  | 0.70 (0.28 – 1.12)                     | 0.0010   | 0.57 (0.17 – 0.96)                        | 0.0048   |
|                                                        | LR polyps              | 2.89 (2.28 – 3.49)              | <0.0001  | 0.71 (0.26 – 1.17)                     | 0.0020   | 0.35 (-0.02 – 0.73)                       | 0.0661   |
|                                                        | M&HR polyps            | 2.75 (2.26 – 3.24)              | <0.0001  | 1.08 (0.70 – 1.46)                     | <0.0001  | 0.56 (0.24 – 0.88)                        | 0.0006   |
|                                                        | CRC                    | 2.45 (1.22 – 3.67)              | <0.0001  | 2.28 (1.03 – 3.54)                     | 0.0004   | 1.01 (0.11 – 1.92)                        | 0.0285   |
| 2. Anxiety (0-21)                                      | Not screened           | 0.19 (-0.11 – 0.49)             | 0.2178   | 0.27 (-0.10 – 0.63)                    | 0.1521   | N/A                                       | N/A      |
|                                                        | Negative               | Reference                       |          | Reference                              |          | Reference                                 |          |
|                                                        | NoA                    | 3.19 (2.62 – 3.77)              | <0.0001  | 0.78 (0.33 – 1.23)                     | 0.0007   | 0.58 (0.19 – 0.97)                        | 0.0037   |
|                                                        | LR polyps              | 3.41 (2.73 – 4.08)              | <0.0001  | 0.68 (0.23 – 1.14)                     | 0.0034   | 0.36 (0.00 – 0.72)                        | 0.0470   |
|                                                        | M&HR polyps            | 3.34 (2.79 – 3.89)              | <0.0001  | 1.21 (0.80 – 1.63)                     | <0.0001  | 0.86 (0.52 – 1.21)                        | <0.0001  |
|                                                        | CRC                    | 2.66 (1.24 – 4.08)              | 0.0002   | 2.08 (0.86 – 3.30)                     | 0.0008   | 1.04 (0.21 – 1.86)                        | 0.0139   |
| 3. Behaviour (0-21)                                    | Not screened           | 0.57 (0.24 – 0.91)              | 0.0007   | 0.26 (-0.09 – 0.61)                    | 0.1454   | N/A                                       | N/A      |
|                                                        | Negative               | Reference                       |          | Reference                              |          | Reference                                 |          |
|                                                        | NoA                    | 1.75 (1.23 – 2.26)              | <0.0001  | 0.54 (0.08 – 0.99)                     | 0.0220   | 0.48 (0.06 – 0.90)                        | 0.0244   |
|                                                        | LR polyps              | 1.60 (1.08 – 2.11)              | <0.0001  | 0.27 (-0.18 – 0.72)                    | 0.2457   | 0.20 (-0.19 – 0.58)                       | 0.3265   |
|                                                        | M&HR polyps            | 1.50 (1.03 – 1.97)              | <0.0001  | 0.54 (0.15 – 0.93)                     | 0.0064   | 0.36 (-0.01 – 0.73)                       | 0.0595   |
|                                                        | CRC                    | 0.64 (-0.15 – 1.43)             | 0.1111   | 2.00 (0.91 – 3.10)                     | 0.0003   | 1.04 (0.04 – 2.03)                        | 0.0416   |
| 4. Sleep (0-12)                                        | Not screened           | 0.41 (0.11 – 0.70)              | 0.0065   | 0.20 (-0.13 – 0.52)                    | 0.2367   | N/A                                       | N/A      |
|                                                        | Negative               | Reference                       |          | Reference                              |          | Reference                                 |          |
|                                                        | NoA                    | 0.65 (0.28 – 1.02)              | 0.0006   | 0.16 (-0.20 – 0.52)                    | 0.3794   | 0.42 (0.082 – 0.76)                       | 0.0148   |
|                                                        | LR polyps              | 0.83 (0.40 – 1.27)              | 0.0002   | 0.18 (-0.18 – 0.54)                    | 0.3226   | 0.38 (0.007 – 0.75)                       | 0.0459   |
|                                                        | M&HR polyps            | 0.66 (0.29 – 1.03)              | 0.0004   | 0.46 (0.12 – 0.80)                     | 0.0087   | 0.36 (0.053 – 0.67)                       | 0.0218   |
|                                                        | CRC                    | 0.45 (-0.34 – 1.24)             | 0.2629   | 0.80 (-0.08 – 1.68)                    | 0.0745   | 0.58 (-0.20 – 1.37)                       | 0.1468   |
| 5. Introvert (0-15)                                    | Not screened           | 0.18 (-0.08 – 0.43)             | 0.1771   | 0.18 (-0.11 – 0.46)                    | 0.2244   | N/A                                       | N/A      |
|                                                        | Negative               | Reference                       |          | Reference                              |          | Reference                                 |          |
|                                                        | NoA                    | 1.74 (1.35 – 2.13)              | <0.0001  | 0.41 (0.08 – 0.74)                     | 0.0159   | 0.35 (0.04 – 0.65)                        | 0.0256   |
|                                                        | LR polyps              | 1.83 (1.37 – 2.30)              | <0.0001  | 0.25 (-0.09 – 0.59)                    | 0.1498   | 0.17 (-0.13 – 0.46)                       | 0.2715   |
|                                                        | M&HR polyps            | 1.72 (1.34 – 2.10)              | <0.0001  | 0.57 (0.28 – 0.86)                     | 0.0001   | 0.47 (0.18 – 0.76)                        | 0.0016   |
|                                                        | CRC                    | 1.67 (0.72 – 2.63)              | 0.0006   | 1.27 (0.33 – 2.22)                     | 0.0080   | 0.66 (-0.03 – 1.35)                       | 0.0606   |
| 6. Change in body perception (0-9)                     | Not screened           | 0.27 (0.09 – 0.45)              | 0.0034   | 0.12 (-0.08 – 0.32)                    | 0.2276   | N/A                                       | N/A      |
|                                                        | Negative               | Reference                       |          | Reference                              |          | Reference                                 |          |
|                                                        | NoA                    | 0.57 (0.32 – 0.79)              | <0.0001  | 0.20 (-0.03 – 0.43)                    | 0.1033   | 0.18 (-0.04 – 0.39)                       | 0.1053   |
|                                                        | LR polyps              | 0.63 (0.34 – 0.91)              | <0.0001  | 0.06 (-0.18 – 0.31)                    | 0.6103   | 0.07 (-0.14 – 0.29)                       | 0.5093   |
|                                                        | M&HR polyps            | 0.55 (0.32 – 0.79)              | <0.0001  | 0.20 (0.00 – 0.40)                     | 0.0504   | 0.10 (-0.07 – 0.28)                       | 0.2532   |
|                                                        | CRC                    | 0.39 (-0.09 – 0.87)             | 0.1109   | 1.10 (0.47 – 1.73)                     | 0.0006   | 0.44 (-0.04 – 0.93)                       | 0.0749   |
| 7. Fear & powerlessness (0-12)                         | Not screened           | 0.20 (0.00 – 0.40)              | 0.0511   | 0.06 (-0.17 – 0.28)                    | 0.6135   | N/A                                       | N/A      |
|                                                        | Negative               | Reference                       |          | Reference                              |          | Reference                                 |          |
|                                                        | NoA                    | 1.34 (1.00 – 1.68)              | <0.0001  | 0.40 (0.10 – 0.70)                     | 0.0092   | 0.21 (-0.03 – 0.44)                       | 0.0812   |
|                                                        | LR polyps              | 1.27 (0.88 – 1.66)              | <0.0001  | 0.21 (-0.09 – 0.51)                    | 0.1750   | 0.14 (-0.11 – 0.40)                       | 0.2674   |
|                                                        | M&HR polyps            | 1.19 (0.88 – 1.49)              | <0.0001  | 0.34 (0.11 – 0.56)                     | 0.0036   | 0.35 (0.13 – 0.56)                        | 0.0016   |
|                                                        | CRC                    | 1.33 (0.61 – 2.05)              | 0.0003   | 1.21 (0.44 – 1.99)                     | 0.0021   | 0.63 (0.10 – 1.17)                        | 0.021    |
| 8. Change in perception of own age (0-6)               | Not screened           | 0.09 (-0.05 – 0.22)             | 0.2090   | 0.07 (-0.08 – 0.22)                    | 0.3407   | N/A                                       | N/A      |
|                                                        | Negative               | Reference                       |          | Reference                              |          | Reference                                 |          |
|                                                        | NoA                    | 0.29 (0.09 – 0.49)              | 0.0037   | 0.20 (0.01 – 0.38)                     | 0.0376   | 0.15 (-0.01 – 0.32)                       | 0.0636   |
|                                                        | LR polyps              | 0.30 (0.08 – 0.52)              | 0.0073   | 0.12 (-0.07 – 0.30)                    | 0.2198   | 0.14 (-0.04 – 0.33)                       | 0.1229   |
|                                                        | M&HR polyps            | 0.23 (0.05 – 0.41)              | 0.0106   | 0.22 (0.06 – 0.37)                     | 0.0069   | 0.17 (0.02 – 0.32)                        | 0.0300   |
|                                                        | CRC                    | 0.20 (-0.19 – 0.59)             | 0.3113   | 0.25 (-0.12 – 0.62)                    | 0.1869   | 0.26 (-0.09 – 0.62)                       | 0.1463   |
| 9. Emotional reactions (0-6)                           | Not screened           | 0.10 (0.00 – 0.21)              | 0.0578   | 0.05 (-0.06 – 0.16)                    | 0.3825   | N/A                                       | N/A      |
|                                                        | Negative               | Reference                       |          | Reference                              |          | Reference                                 |          |
|                                                        | NoA                    | 0.13 (-0.01 – 0.27)             | 0.0740   | 0.02 (-0.10 – 0.14)                    | 0.7703   | 0.09 (-0.03 – 0.20)                       | 0.1543   |
|                                                        | LR polyps              | 0.15 (0.00 – 0.30)              | 0.0565   | 0.07 (-0.08 – 0.22)                    | 0.3642   | 0.01 (-0.10 – 0.12)                       | 0.8496   |
|                                                        | M&HR polyps            | 0.05 (-0.08 – 0.17)             | 0.4723   | -0.02 (-0.13 – 0.09)                   | 0.7104   | 0.05 (-0.06 – 0.15)                       | 0.3940   |
|                                                        | CRC                    | 0.06 (-0.23 – 0.36)             | 0.6711   | 0.17 (-0.12 – 0.46)                    | 0.2574   | 0.12 (-0.11 – 0.36)                       | 0.3125   |
| <b>COS-CRC part I, single items, (range of values)</b> |                        |                                 |          |                                        |          |                                           |          |
| 10. Lifestyle changes (0-3)                            | Not screened           | 0.08 (0.02 – 0.15)              | 0.0134   | 0.04 (-0.03 – 0.11)                    | 0.2929   | N/A                                       | N/A      |
|                                                        | Negative               | Reference                       |          | Reference                              |          | Reference                                 |          |

|                                                       |              |                      |        |                       |         |                       |         |
|-------------------------------------------------------|--------------|----------------------|--------|-----------------------|---------|-----------------------|---------|
|                                                       | NoA          | -0.02 (-0.09 – 0.05) | 0.6208 | -0.01 (-0.08 – 0.06)  | 0.6931  | 0.06 (-0.03 – 0.14)   | 0.1814  |
|                                                       | LR polyps    | 0.06 (-0.03 – 0.14)  | 0.2132 | 0.11 (0.02 – 0.20)    | 0.0182  | 0.05 (-0.04 – 0.15)   | 0.2736  |
|                                                       | M&HR polyps  | 0.04 (-0.04 – 0.16)  | 0.3558 | 0.08 (0.01 – 0.16)    | 0.0277  | 0.09 (0.01 – 0.18)    | 0.0292  |
|                                                       | CRC          | 0.01 (-0.12 – 0.14)  | 0.8916 | 0.34 (0.10 – 0.57)    | 0.0046  | 0.17 (-0.05 – 0.38)   | 0.1233  |
| 11. Impact on sexuality (0-3)                         | Not screened | 0.16 (0.06 – 0.26)   | 0.0013 | 0.12 (0.02 – 0.22)    | 0.0184  | N/A                   | N/A     |
|                                                       | Negative     | Reference            |        | Reference             |         | Reference             |         |
|                                                       | NoA          | 0.11 (-0.01 – 0.23)  | 0.0841 | 0.04 (-0.07 – 0.14)   | 0.5340  | 0.14 (0.02 – 0.25)    | 0.0229  |
|                                                       | LR polyps    | 0.13 (0.00 – 0.27)   | 0.0469 | 0.12 (0.00 – 0.24)    | 0.0592  | 0.14 (0.00 – 0.28)    | 0.0480  |
|                                                       | M&HR polyps  | 0.09 (-0.02 – 0.20)  | 0.1157 | 0.16 (0.05 – 0.26)    | 0.0045  | 0.11 (0.00 – 0.22)    | 0.0505  |
|                                                       | CRC          | 0.20 (-0.09 – 0.49)  | 0.1833 | 0.47 (0.15 – 0.79)    | 0.0036  | 0.29 (-0.05 – 0.63)   | 0.0944  |
| <b>COS-CRC part Ix, scale (range of values)</b>       |              |                      |        |                       |         |                       |         |
| 12. Perceived burden of bowel preparation (0-18)      | Not screened |                      |        |                       |         |                       |         |
|                                                       | Negative     |                      |        |                       |         |                       |         |
|                                                       | NoA          |                      |        | Reference             |         | Reference             |         |
|                                                       | LR polyps    |                      |        | -0.19 (-0.89 – 0.51)  | 0.5897  | -0.12 (-0.77 – 0.52)  | 0.7055  |
|                                                       | M&HR polyps  |                      |        | 0.13 (-0.52 – 0.78)   | 0.6981  | 0.79 (0.19 – 1.39)    | 0.0095  |
|                                                       | CRC          |                      |        | 0.17 (-1.12 – 1.47)   | 0.7915  | 0.24 (-0.74 – 1.22)   | 0.6321  |
| 13. Negative physical colonoscopy experiences (0-9)   | Not screened |                      |        |                       |         |                       |         |
|                                                       | Negative     |                      |        |                       |         |                       |         |
|                                                       | NoA          |                      |        | Reference             |         | Reference             |         |
|                                                       | LR polyps    |                      |        | -0.04 (-0.48 – 0.41)  | 0.8632  | -0.46 (-0.86 – -0.07) | 0.0214  |
|                                                       | M&HR polyps  |                      |        | 0.36 (-0.04 – 0.75)   | 0.0803  | 0.29 (-0.10 – 0.68)   | 0.1414  |
|                                                       | CRC          |                      |        | 0.32 (-0.47 – 1.11)   | 0.4242  | -0.36 (-1.06 – 0.34)  | 0.3132  |
| 14. Negative emotional colonoscopy experiences (0-15) | Not screened |                      |        |                       |         |                       |         |
|                                                       | Negative     |                      |        |                       |         |                       |         |
|                                                       | NoA          |                      |        | Reference             |         | Reference             |         |
|                                                       | LR polyps    |                      |        | -0.05 (-0.63 – 0.52)  | 0.8535  | -0.43 (-1.01 – 0.15)  | 0.1483  |
|                                                       | M&HR polyps  |                      |        | 0.43 (-0.15 – 1.00)   | 0.1456  | 0.13 (-0.44 – 0.69)   | 0.6640  |
|                                                       | CRC          |                      |        | 1.03 (-0.34 – 2.40)   | 0.1391  | 0.43 (-0.83 – 1.69)   | 0.5036  |
| 15. Knowledge of having colorectal polyps (0-6)       | Not screened |                      |        |                       |         |                       |         |
|                                                       | Negative     |                      |        |                       |         |                       |         |
|                                                       | NoA          |                      |        |                       |         |                       |         |
|                                                       | LR polyps    |                      |        | -0.58 (-0.84 – -0.33) | <0.0001 | -0.55 (-0.78 – -0.31) | <0.0001 |
|                                                       | M&HR polyps  |                      |        | Reference             |         | Reference             |         |
|                                                       | CRC          |                      |        |                       |         |                       |         |
| <b>COS-CRC part Ix, single item (range of values)</b> |              |                      |        |                       |         |                       |         |
| 16. Regret participation (0-3)                        | Not screened |                      |        |                       |         |                       |         |
|                                                       | Negative     |                      |        |                       |         |                       |         |
|                                                       | NoA          |                      |        | Reference             |         | Reference             |         |
|                                                       | LR polyps    |                      |        | 0.03 (-0.04 – 0.09)   | 0.4349  | 0.02 (-0.06 – 0.09)   | 0.6887  |
|                                                       | M&HR polyps  |                      |        | 0.03 (-0.03 – 0.09)   | 0.2614  | 0.04 (-0.03 – 0.11)   | 0.2906  |
|                                                       | CRC          |                      |        | 0.06 (-0.08 – 0.21)   | 0.3811  | -0.02 (-0.13 – 0.10)  | 0.7873  |
| <b>COS-CRC part II, scale (range of values)</b>       |              |                      |        |                       |         |                       |         |
| 17. Social relations (0-6)                            | Not screened |                      |        |                       |         |                       |         |
|                                                       | Negative     |                      |        | Reference             |         | Reference             |         |
|                                                       | NoA          |                      |        | 0.06 (-0.04 – 0.17)   | 0.2263  | 0.14 (0.03 – 0.25)    | 0.0131  |
|                                                       | LR polyps    |                      |        | -0.01 (-0.12 – 0.09)  | 0.8039  | 0.04 (-0.07 – 0.14)   | 0.4867  |
|                                                       | M&HR polyps  |                      |        | 0.06 (-0.03 – 0.16)   | 0.2061  | 0.07 (-0.02 – 0.17)   | 0.1415  |
|                                                       | CRC          |                      |        | 0.44 (0.11 – 0.78)    | 0.1718  | 0.34 (0.05 – 0.63)    | 0.0226  |
| 18. Relaxed/Calm (0-6)                                | Not screened |                      |        |                       |         |                       |         |
|                                                       | Negative     |                      |        | Reference             |         | Reference             |         |
|                                                       | NoA          |                      |        | 0.72 (0.52 – 0.92)    | <0.0001 | 0.36 (0.18 – 0.53)    | <0.0001 |
|                                                       | LR polyps    |                      |        | 0.64 (0.44 – 0.84)    | <0.0001 | 0.34 (0.16 – 0.53)    | 0.0003  |
|                                                       | M&HR polyps  |                      |        | 0.64 (0.46 – 0.82)    | <0.0001 | 0.45 (0.28 – 0.61)    | <0.0001 |
|                                                       | CRC          |                      |        | 0.90 (0.46 – 0.82)    | 0.0004  | 0.65 (0.24 – 1.06)    | 0.0018  |
| 19. Existential values (0-10)                         | Not screened |                      |        |                       |         |                       |         |
|                                                       | Negative     |                      |        | Reference             |         | Reference             |         |
|                                                       | NoA          |                      |        | 0.59 (0.30 – 0.87)    | <0.0001 | 0.42 (0.18 – 0.67)    | 0.0008  |
|                                                       | LR polyps    |                      |        | 0.42 (0.15 – 0.69)    | 0.002   | 0.44 (0.17 – 0.70)    | 0.0011  |
|                                                       | M&HR polyps  |                      |        | 0.54 (0.29 – 0.78)    | <0.0001 | 0.48 (0.26 – 0.69)    | <0.0001 |
|                                                       | CRC          |                      |        | 1.36 (0.66 – 2.05)    | 0.0001  | 1.44 (0.81 – 2.07)    | <0.0001 |

|                       |              |  |  |                     |                   |                     |               |
|-----------------------|--------------|--|--|---------------------|-------------------|---------------------|---------------|
| 20.Impulsivity (0-12) | Not screened |  |  |                     |                   |                     |               |
|                       | Negative     |  |  | Reference           |                   | Reference           |               |
|                       | NoA          |  |  | 0.22 (0.00 – 0.44)  | 0.0494            | 0.18 (-0.03 – 0.40) | 0.0933        |
|                       | LR polyps    |  |  | 0.04 (-0.14 – 0.22) | 0.6579            | 0.04 (-0.14 – 0.22) | 0.6798        |
|                       | M&HR polyps  |  |  | 0.18 (0.00 – 0.36)  | 0.0557            | 0.12 (-0.07 – 0.30) | 0.2246        |
|                       | CRC          |  |  | 1.49 (0.66 – 2.31)  | <b>0.0004</b>     | 0.99 (0.32 – 1.66)  | <b>0.0039</b> |
| 21.Empathy (0-6)      | Not screened |  |  |                     |                   |                     |               |
|                       | Negative     |  |  | Reference           |                   | Reference           |               |
|                       | NoA          |  |  | 0.19 (0.04 – 0.33)  | <b>0.0102</b>     | 0.24 (0.10 – 0.38)  | <b>0.0010</b> |
|                       | LR polyps    |  |  | 0.17 (0.01 – 0.32)  | 0.0322            | 0.25 (0.09 – 0.41)  | <b>0.0022</b> |
|                       | M&HR polyps  |  |  | 0.28 (0.14 – 0.42)  | <b>&lt;0.0001</b> | 0.16 (0.03 – 0.28)  | <b>0.0141</b> |
|                       | CRC          |  |  | 0.51 (0.12 – 0.89)  | <b>0.0094</b>     | 0.55 (0.22 – 0.88)  | <b>0.0010</b> |

\* The Benjamini-Hochberg procedure rejects all p-values above 0.023 to control the False Discovery Rate at 0.05.
