# Supplementary material for: Short and long-term psychosocial consequences of participating in a colorectal cancer screening programme: a matched longitudinal study
Source: HighWire-hosted journal article supplement (doi:10.1136/bmjebm-2020-111576), 2021-06-03
Supplement: bmjebm-2020-111576supp002_data_supplement.pdf [file bmjebm-2020-111576supp002_data_supplement.pdf]

## An overview of COS-CRC and the scales and number of items in each scale

| <b>Scales (number of items)</b>                |
|------------------------------------------------|
| <i>Part I</i>                                  |
| Sense of dejection (6)                         |
| Anxiety (7)                                    |
| Behaviour (7)                                  |
| Sleep (4)                                      |
| Introvert (4)                                  |
| Change in body perception (3)                  |
| Fear & Powerlessness (4)                       |
| Change in perception of own age (2)            |
| Emotional reactions (2)                        |
| Life-style changes (single item)               |
| Sexuality (single item)                        |
| <i>Part Ix</i>                                 |
| Perceived burden of bowel preparation (6)      |
| Knowledge of having colorectal polyps (2)      |
| Negative physical colonoscopy experiences (3)  |
| Negative emotional colonoscopy experiences (5) |
| Regret on participation (single item)          |
| <i>Part II</i>                                 |
| Social relations (3)                           |
| Relaxed/calm (3)                               |
| Impulsivity (6)                                |
| Existential values (5)                         |
| Empathy (3)                                    |
