# Supplementary material for: Short and long-term psychosocial consequences of participating in a colorectal cancer screening programme: a matched longitudinal study
Source: HighWire-hosted journal article supplement (doi:10.1136/bmjebm-2020-111576), 2021-06-03
Supplement: bmjebm-2020-111576supp003_data_supplement.pdf [file bmjebm-2020-111576supp003_data_supplement.pdf]

**Response categories COS-CRC, Part I and Part Ix**

| Have you, <b>during the last four days</b> , experienced any of the following? | Not at all               | A bit                    | Quite a bit              | A lot                    |
|--------------------------------------------------------------------------------|--------------------------|--------------------------|--------------------------|--------------------------|
| 1. I have been worried.                                                        | <input type="checkbox"/> | <input type="checkbox"/> | <input type="checkbox"/> | <input type="checkbox"/> |

**Response categories COS-CRC, Part II**

Considering everything, have the examinations resulted  
in any of the following:

**Please choose only one alternative per question**

3. After the examinations, I feel:

|                                                                                   |                          |                          |                                                                                    |                          |
|-----------------------------------------------------------------------------------|--------------------------|--------------------------|------------------------------------------------------------------------------------|--------------------------|
| <input type="checkbox"/>                                                          | <input type="checkbox"/> | <input type="checkbox"/> | <input type="checkbox"/>                                                           | <input type="checkbox"/> |
| Much less relaxed                                                                 | Less relaxed             | As relaxed as before     | More relaxed                                                                       | Much more relaxed        |
|  |                          |                          |  |                          |
| <b>Less relaxed</b>                                                               |                          |                          | <b>More relaxed</b>                                                                |                          |
